# Supplementary material for: Gender Differences in the Psychometric Characteristics of the Inventory of Statements About Self-Injury in A Community Adolescent Sample
Source: Research Square preprint supplement (doi:10.21203/rs.3.rs-151042/v1), 2021-01-28
Supplement: Supplementary file 1 [file 92961955987245caf662c4a1.docx]

**Gender differences in the psychometric characteristics of the Inventory of Statements About Self-Injury in a community adolescent sample**

Melinda Reinhardt, PhD 1,2*, Gyöngyi Kökönyei, PhD1,3,4, Boglárka Drubina, MA5,1, Róbert Urbán, PhD1

1Institute of Psychology, ELTE Eötvös Loránd University, Budapest, Hungary

2XIV. District Medical Center, Child and Adolescent Psychiatry, Budapest, Hungary

3SE-NAP2 Genetic Brain Imaging Migraine Research Group, Hungarian Academy of Sciences, Semmelweis University, Budapest, Hungary

4Department of Pharmacodynamics, Faculty of Pharmacy, Semmelweis University, Budapest, Hungary

5Doctoral School of Psychology, ELTE Eötvös Loránd University, Budapest, Hungary

***Corresponding Author**: Melinda Reinhardt, PhD, Department of Clinical Psychology and Addiction, Institute of Psychology, Faculty of Education and Psychology, ELTE Eötvös Loránd University, Budapest, Hungary, H-1064, Budapest, Izabella Street 46., Phone: +36-1461-4500/5670; +36-70-6176927, Fax: +36-1461-2695.

E-mail: [reinhardt.melinda@ppk.elte.hu](mailto:reinhardt.melinda@ppk.elte.hu)

ORCID: <https://orcid.org/0000-0001-7010-5623>

**Supplementary Table 1**

*Zero-order correlations of the variables among girls who engage(d) in self-harm*

|  | 1. | 2. | 3. | 4. | 5. | 6. | 7. | 8. | 9. | 10. | 11. | 12. | 13. | 14. | 15. | 16. | 17. | 18. | 19. | 20. |
| --- | --- | --- | --- | --- | --- | --- | --- | --- | --- | --- | --- | --- | --- | --- | --- | --- | --- | --- | --- | --- |
| 1. Age | - | -0.01 | 0.002 | 0.08 | 0.03 | 0.10 | -0.04 | 0.10 | 0.01 | 0.02 | -0.01 | 0.03 | -0.02 | -0.02 | 0.08 | **-0.13** | **-0.13** | 0.002 | -0.11 | **-0.17** |
| 2. Loneliness# |  | - | **-0.43** | **-0.53** | **-0.56** | **-0.23** | **0.15** | **-0.29** | **-0.41** | **-0.32** | **0.15** | **-0.17** | **-0.17** | 0.12 | 0.06 | **0.25** | 0.05 | -0.06 | -0.07 | 0.02 |
| 3. AFQ-Y8 |  |  | - | **0.62** | **0.52** | **0.35** | **-0.15** | **0.33** | **0.43** | **0.35** | -0.08 | **0.21** | **0.23** | -0.002 | 0.01 | -0.11 | 0.03 | 0.09 | 0.04 | **0.13** |
| 4. SCRS |  |  |  | - | **0.65** | **0.24** | **-0.12** | **0.32** | **0.52** | **0.28** | **-0.16** | **0.21** | **0.23** | **-0.16** | -0.11 | -0.11 | 0.003 | 0.06 | 0.06 | 0.04 |
| 5. SDQ internalizing |  |  |  |  | - | **0.26** | **-0.21** | **0.26** | **0.37** | **0.29** | **-0.13** | **0.16** | **0.21** | -0.09 | -0.04 | **-0.15** | 0.003 | 0.05 | 0.02 | 0.08 |
| 6. SDQ externalizing |  |  |  |  |  | - | **-0.21** | **0.16** | **0.18** | **0.24** | 0.06 | **0.13** | **0.15** | 0.05 | **0.21** | -0.07 | 0.10 | **0.17** | 0.09 | **0.15** |
| 7. SDQ prosocial |  |  |  |  |  |  | - | -0.08 | 0.03 | -0.03 | 0.08 | -0.01 | -0.02 | 0.03 | -0.06 | 0.11 | 0.06 | -0.03 | 0.04 | -0.07 |
| 8. Affect regulation* |  |  |  |  |  |  |  | - | **0.51** | **0.49** | -0.01 | **0.40** | **0.26** | 0.05 | 0.09 | **-0.18** | 0.02 | **0.13** | 0.01 | 0.09 |
| 9. Self-punishment* |  |  |  |  |  |  |  |  | - | **0.46** | -0.11 | **0.35** | **0.34** | -0.03 | 0.11 | **-0.14** | 0.02 | **0.20** | **0.13** | 0.09 |
| 10. Anti-dissociation* |  |  |  |  |  |  |  |  |  | - | -0.04 | **0.42** | **0.34** | 0.03 | **0.20** | **-0.17** | 0.04 | **0.28** | **0.16** | 0.12 |
| 11. Anti-suicide* |  |  |  |  |  |  |  |  |  |  | - | 0.10 | **0.15** | **0.29** | **0.14** | **0.30** | **0.29** | **0.21** | **0.35** | **0.14** |
| 12. Marking distress* |  |  |  |  |  |  |  |  |  |  |  | - | **0.30** | 0.11 | 0.05 | 0.04 | **0.38** | **0.32** | **0.24** | **0.28** |
| 13. Interpers. boundaries* |  |  |  |  |  |  |  |  |  |  |  |  | - | **0.27** | **0.27** | 0.08 | **0.15** | **0.23** | **0.36** | **0.21** |
| 14. Self-care* |  |  |  |  |  |  |  |  |  |  |  |  |  | - | **0.24** | **0.38** | **0.37** | **0.22** | **0.29** | **0.23** |
| 15. Sensation seeking* |  |  |  |  |  |  |  |  |  |  |  |  |  |  | - | 0.06 | -0.01 | **0.42** | **0.26** | **0.21** |
| 16. Peer bonding* |  |  |  |  |  |  |  |  |  |  |  |  |  |  |  | - | **0.50** | 0.12 | **0.36** | **0.18** |
| 17. Interpers. influence* |  |  |  |  |  |  |  |  |  |  |  |  |  |  |  |  | - | **0.18** | **0.28** | **0.26** |
| 18. Toughness* |  |  |  |  |  |  |  |  |  |  |  |  |  |  |  |  |  | - | **0.43** | **0.17** |
| 19. Autonomy* |  |  |  |  |  |  |  |  |  |  |  |  |  |  |  |  |  |  | - | **0.33** |
| 20. Revenge* |  |  |  |  |  |  |  |  |  |  |  |  |  |  |  |  |  |  |  | - |

*Note.* N=251. #: Reversed item. Correlation coefficients presented with bold figures are significant at least p < 0.05 level. AFQ-Y8=Avoidance and Fusion Questionnaire for Youth. SCRS=Self-Critical Rumination Scale. SDQ=Strength and Difficulties Questionnaire. SDQ internalizing=Strength and Difficulties Questionnaire internalizing symptoms. SDQ externalizing=Strength and Difficulties Questionnaire externalizing symptoms. SDQ prosocial=Strength and Difficulties Questionnaire prosocial behavior.

* Self-harm motives according to the Inventory of Statements About Self-Injury (ISAS).
